# Supplementary material for: Microbiota and metabolites alterations in proximal and distal gastric cancer patients
Source: Springer Nature journal article supplement (doi:10.1186/s12967-022-03650-x), 2022-09-30

A)

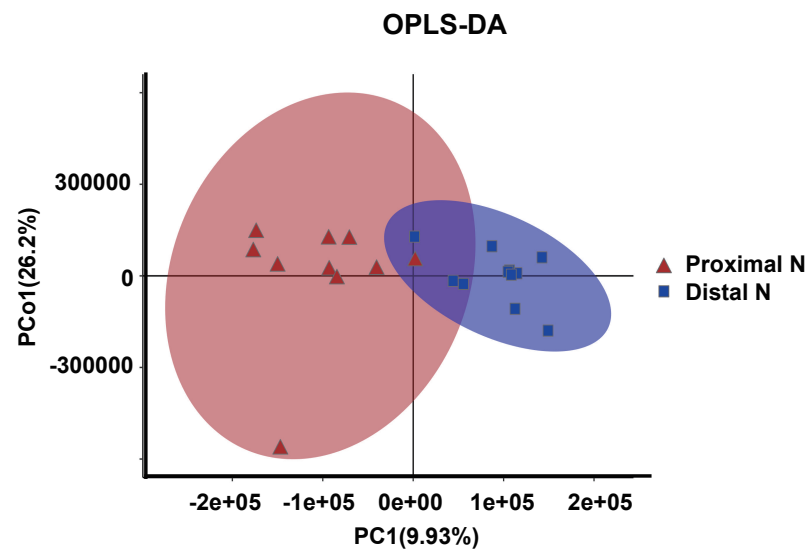

B)

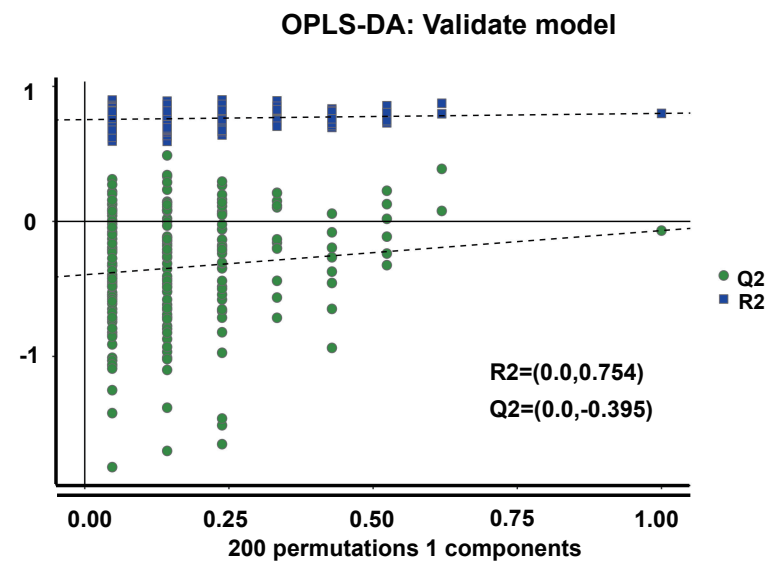

Supplement: MOESM5 [file 23558698]
